# Supplementary material
Source: PubMed Central journal article supplement (PMC2754730)
Supplement: NIHMS134571-supplement-01.pdf [file NIHMS134571-supplement-01.pdf]

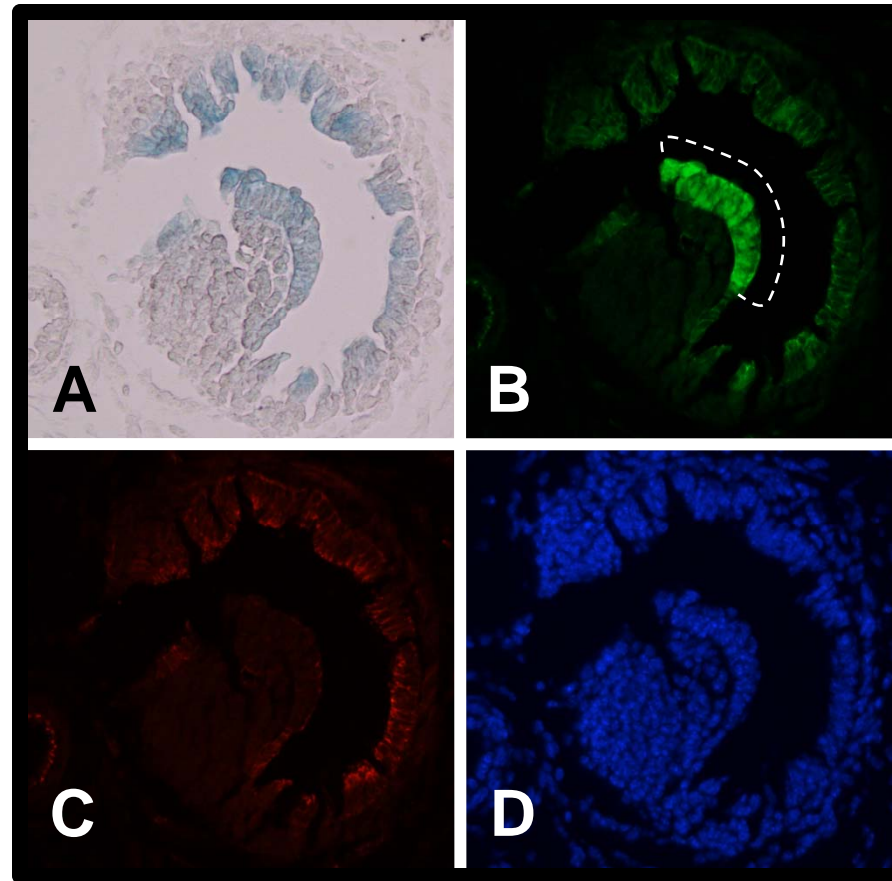

### Supplemental Fig. 1

*Nkx2.1-cre* activity is determined by  $\beta$ -gal staining (A) in proximal airway of a E13 triple transgenic embryo, *Nkx2.1-cre;Catnb[+/lox(ex3)];Rosa26-LacZ*. The same section was then subject to immunofluorescent analysis with anti- $\beta$ -catenin antibodies. Staining with anti- $\beta$ -catenin C-terminal antibody reveals that accumulation of  $\beta$ -catenin (B, bracket, green) is only observed in the apical domain epithelial cells of the polyps. Staining with anti- $\beta$ -catenin N-terminal antibody (C, red) shows expression of wild-type  $\beta$ -catenin. Morphology of the section is shown by Dapi staining (D).

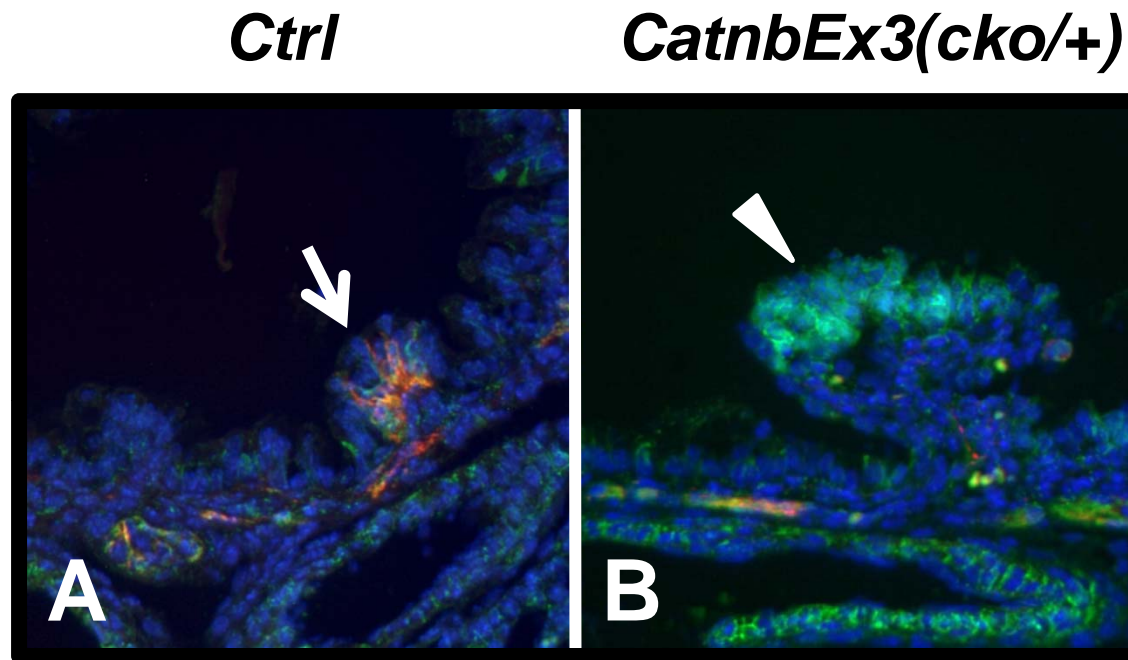

**Supplemental Fig. 2**

Immunofluorescent analysis of synaptophysin (SYP, red) and  $\beta$ -catenin (green) in E18 control (A) and mutant (B) lungs. SYP is detected in neuroendocrine cells of control lungs (arrow), but is not detected in epithelial cells with accumulation of  $\beta$ -catenin in the mutant lung (arrowhead).

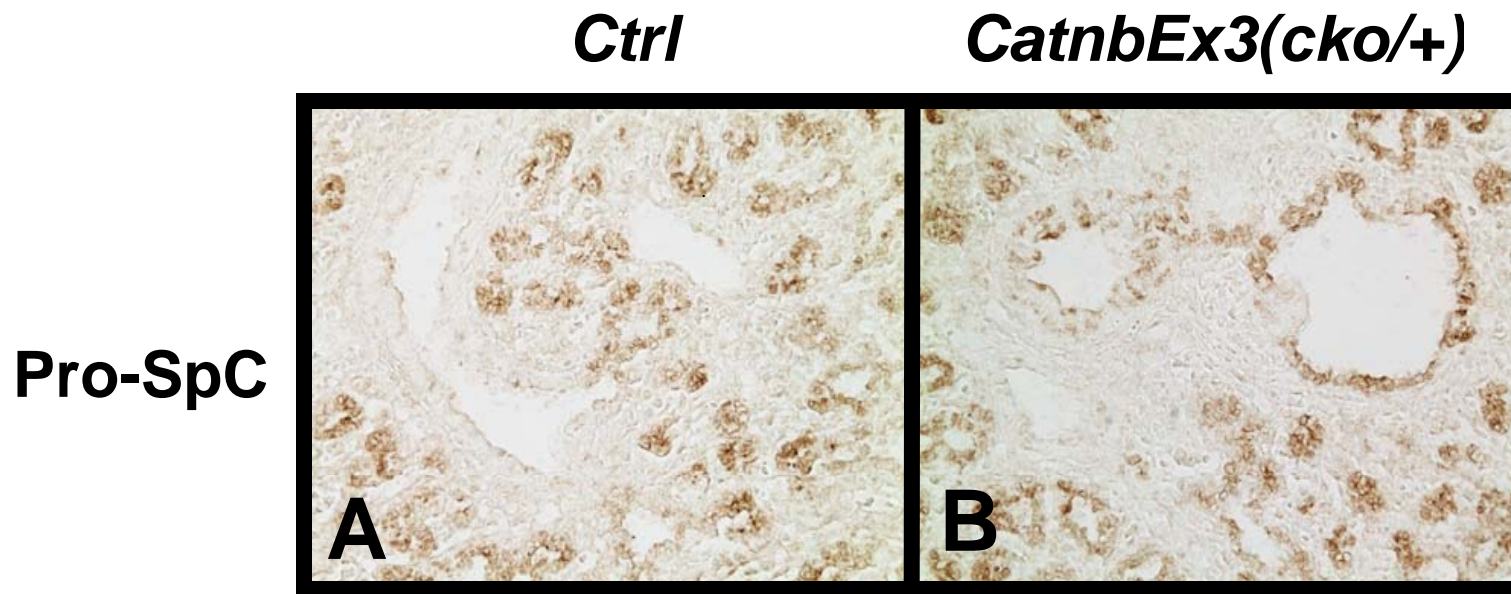

Supplemental Fig. 3  
Immunostaining of pro-SpC in E16 control (A) and mutant (B) lungs.
